# Supplementary material
Source: HighWire-hosted journal article supplement (https://www.g3journal.org/content/suppl/2017/07/17/g3.117.043851)
Supplement: TableS1.pdf [file TableS1.pdf]

**Supplemental Table 1.** Yeast strains used in this study

| Strain                                                       | Nuclear genotype                                                   | Mitochondrial genotype                      | Source                                   |
|--------------------------------------------------------------|--------------------------------------------------------------------|---------------------------------------------|------------------------------------------|
| OP11c-55R5                                                   | <i>MATa leu2 ura3 trp1</i>                                         | $[\rho^+ \omega^- \text{ens2 Oli}_1^R]$     | Ling <i>et al.</i> (38)                  |
| OP11c-55R5/pVT100U                                           | <i>MATa leu2 ura3 trp1</i> pVT100U (URA3)                          | $[\rho^+ \omega^- \text{ens2 Oli}_1^R]$     | This study                               |
| OP11c-55R5/pVT100U-mtTomato                                  | <i>MATa leu2 ura3 trp1</i> pVT100U (mtTomato, URA3)                | $[\rho^+ \omega^- \text{ens2 Oli}_1^R]$     | This study                               |
| OP11c-55R5/pVT100U-RNR1                                      | <i>MATa leu2 ura3 trp1</i> pVT100U (RNR1, URA3)                    | $[\rho^+ \omega^- \text{ens2 Oli}_1^R]$     | This study                               |
| OP11c-55R5/pVT100U- <i>rnr1</i> -Y629C                       | <i>MATa leu2 ura3 trp1</i> pVT100U ( <i>rnr1</i> , URA3)           | $[\rho^+ \omega^- \text{ens2 Oli}_1^R]$     | This study                               |
| OP11c-55R5/pVT100U-SML1                                      | <i>MATa leu2 ura3 trp1</i> pVT100U (SML1, URA3)                    | $[\rho^+ \omega^- \text{ens2 Oli}_1^R]$     | This study                               |
| OP11c-55R5 $\Delta$ <i>sml1</i> /pVT100U                     | <i>MATa leu2 ura3 trp1 sml1::KAN</i> pVT100U (URA3)                | $[\rho^+ \omega^- \text{ens2 Oli}_1^R]$     | This study                               |
| OP11c-55R5 $\Delta$ <i>sml1</i> /pVT100U-mtTomato            | <i>MATa leu2 ura3 trp1 sml1::KAN</i> pVT100U (mtTomato, URA3)      | $[\rho^+ \omega^- \text{ens2 Oli}_1^R]$     | This study                               |
| OP11c-55R5 $\Delta$ <i>sml1</i> /pVT100U-RNR1                | <i>MATa leu2 ura3 trp1 sml1::KAN</i> pVT100U (RNR1, URA3)          | $[\rho^+ \omega^- \text{ens2 Oli}_1^R]$     | This study                               |
| OP11c-55R5 $\Delta$ <i>sml1</i> /pVT100U- <i>rnr1</i> -Y629C | <i>MATa leu2 ura3 trp1 sml1::KAN</i> pVT100U ( <i>rnr1</i> , URA3) | $[\rho^+ \omega^- \text{ens2 Oli}_1^R]$     | This study                               |
| OP11c-55R5 $\Delta$ <i>din7</i>                              | <i>MATa leu2 ura3 trp1 din7::URA3</i>                              | $[\rho^+ \omega^- \text{ens2 Oli}_1^R]$     | This study                               |
| OP11c-55R5 $\Delta$ <i>din7</i> $\Delta$ <i>rrm3</i>         | <i>MATa leu2 ura3 trp1 din7::URA3 rrm3::KAN</i>                    | $[\rho^+ \omega^- \text{ens2 Oli}_1^R]$     | This study                               |
| OP11c-55R5 $\Delta$ <i>din7</i> $\Delta$ <i>sml1</i>         | <i>MATa leu2 ura3 trp1 din7::URA3 sml1::KAN</i>                    | $[\rho^+ \omega^- \text{ens2 Oli}_1^R]$     | This study                               |
| OP11c-55R5 $\Delta$ <i>rrm3</i>                              | <i>MATa leu2 ura3 trp1 rrm3::KAN</i>                               | $[\rho^+ \omega^- \text{ens2 Oli}_1^R]$     | This study                               |
| OP11c-55R5 $\Delta$ <i>sml1</i>                              | <i>MATa leu2 ura3 trp1 sml1::KAN</i>                               | $[\rho^+ \omega^- \text{ens2 Oli}_1^R]$     | This study                               |
| YKN1423A-1                                                   | <i>MATa leu2 ura3 met3</i>                                         | [HS $\rho^-$ ]                              | Ling <i>et al.</i> (13)                  |
| YKN1423A-1 $\Delta$ <i>sml1</i>                              | <i>MATa leu2 ura3 met3 sml1::KAN</i>                               | [HS $\rho^-$ ]                              | This study                               |
| YKN1423A-2                                                   | <i>MATa leu2 ura3 met3</i>                                         | Normal suppressive [ $\rho^-$ ]             | Ling <i>et al.</i> (13)                  |
| YKN1423A-2 $\Delta$ <i>sml1</i>                              | <i>MATa leu2 ura3 met3 sml1::KAN</i>                               | Normal suppressive [ $\rho^-$ ]             | This study                               |
| YKN1423C-1                                                   | <i>MATa leu2 ura3 met3</i>                                         | [HS $\rho^-$ ]                              | Ling <i>et al.</i> (13)                  |
| YKN1423C-1/pVT100U                                           | <i>MATa leu2 ura3 met3</i> pVT100U (URA3)                          | [HS $\rho^-$ ]                              | This study                               |
| YKN1423C-1/pVT100U-mtGFP                                     | <i>MATa leu2 ura3 met3</i> pVT100U (mtGFP, URA3)                   | [HS $\rho^-$ ]                              | This study                               |
| YKN1423C-1/pVT100U-RNR1                                      | <i>MATa leu2 ura3 met3</i> pVT100U (RNR1, URA3)                    | [HS $\rho^-$ ]                              | This study                               |
| YKN1423C-1/pVT100U- <i>rnr1</i> -Y629C                       | <i>MATa leu2 ura3 met3</i> pVT100U ( <i>rnr1</i> , URA3)           | [HS $\rho^-$ ]                              | This study                               |
| YKN1423C-1 $\Delta$ <i>sml1</i> /pVT100U                     | <i>MATa leu2 ura3 met3 sml1::KAN</i> pVT100U (URA3)                | [HS $\rho^-$ ]                              | This study                               |
| YKN1423C-1 $\Delta$ <i>sml1</i> /pVT100U-mtGFP               | <i>MATa leu2 ura3 met3 sml1::KAN</i> pVT100U (mtGFP, URA3)         | [HS $\rho^-$ ]                              | This study                               |
| YKN1423C-1 $\Delta$ <i>sml1</i> /pVT100U-RNR1                | <i>MATa leu2 ura3 met3 sml1::KAN</i> pVT100U (RNR1, URA3)          | [HS $\rho^-$ ]                              | This study                               |
| YKN1423C-1 $\Delta$ <i>sml1</i> /pVT100U- <i>rnr1</i> -Y629C | <i>MATa leu2 ura3 met3 sml1::KAN</i> pVT100U ( <i>rnr1</i> , URA3) | [HS $\rho^-$ ]                              | This study                               |
| YKN1423C-1 $\Delta$ <i>din7</i>                              | <i>MATa leu2 ura3 met3 din7::URA3</i>                              | [HS $\rho^-$ ]                              | This study                               |
| YKN1423C-1 $\Delta$ <i>din7</i> $\Delta$ <i>rrm3</i>         | <i>MATa leu2 ura3 met3 din7::URA3 rrm3::KAN</i>                    | [HS $\rho^-$ ]                              | This study                               |
| YKN1423C-1 $\Delta$ <i>din7</i> $\Delta$ <i>sml1</i>         | <i>MATa leu2 ura3 met3 din7::URA3 sml1::KAN</i>                    | [HS $\rho^-$ ]                              | This study                               |
| YKN1423C-1 $\Delta$ <i>rrm3</i>                              | <i>MATa leu2 ura3 met3 rrm3::KAN</i>                               | [HS $\rho^-$ ]                              | This study                               |
| YKN1423C-1 $\Delta$ <i>sml1</i>                              | <i>MATa leu2 ura3 met3 sml1::KAN</i>                               | [HS $\rho^-$ ]                              | This study                               |
| W303a-187                                                    | <i>MATa ade2 leu2 his3 ura3 trp1 can1</i>                          | $[\rho^+ \omega^- \text{ens2 Chl}_{321}^R]$ | Ling <i>et al.</i> (12)                  |
| IL166-5bp <sup>0</sup>                                       | <i>MATa his1 trp1 can1</i>                                         | $[\rho^0]$                                  | Derived from IL166-187 by EtBr treatment |
